# Supplementary material
Source: MDPI journal article supplement (https://www.mdpi.com/2073-4344/12/12/1612)
Supplement: s1 [file s1]

## SUPPLEMENTARY INFORMATION

# Enhanced Photoredox Activity of BiVO<sub>4</sub>/Prussian Blue Nanocomposites for Efficient Pollutant Removal from Aqueous Media under Low-Cost LEDs Illumination

Abrar Ali Khan <sup>1</sup>, Leonardo Marchiori <sup>2</sup>, Elias Paiva Ferreira-Neto <sup>3</sup>, Heberton Wender <sup>4</sup>, Rashida Parveen <sup>5</sup>, Mohammad Muneeb <sup>1</sup>, Bianca Oliveira Mattos <sup>6</sup>, Ubirajara Pereira Rodrigues-Filho <sup>6</sup>, Sidney José Lima Ribeiro <sup>2</sup> and Sajjad Ullah <sup>1,\*</sup>

<sup>1</sup> Institute of Chemical Sciences, University of Peshawar, Peshawar P.O. Box 25120, Pakistan

<sup>2</sup> Institute of Chemistry, São Paulo State University (UNESP), Araraquara, SP, 14800-060, Brazil

<sup>3</sup> Department of Chemistry, Federal University of Santa Catarina (UFSC), Florianópolis, SC, 88040-900, Brazil

<sup>4</sup> Nano&Photon Research Group, Laboratory of Nanomaterials and Applied Nanotechnology, Institute of Physics, Federal University of Mato Grosso do Sul, Campo Grande, MS, 79070-900, Brazil

<sup>5</sup> Government Girls Degree College Dabgari, Peshawar, KP, 25000, Pakistan

<sup>6</sup> Institute of Chemistry of São Carlos, University of São Paulo, São Carlos, SP, 13560-970, Brazil

\* Correspondence: sajjadullah@uop.edu.pk

## LED emission Spectrum

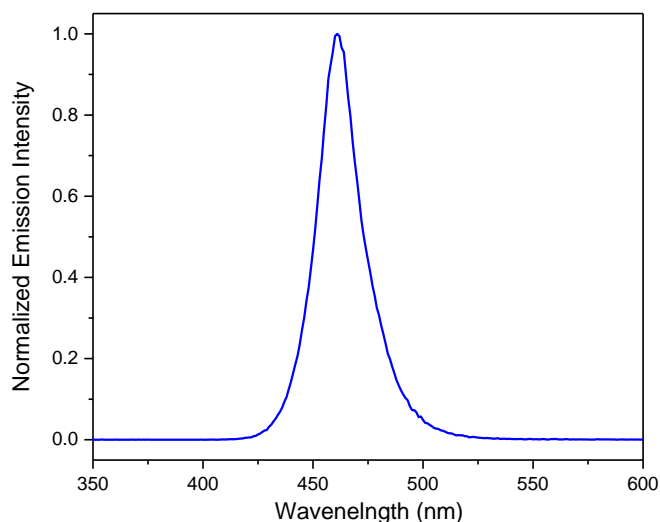

**Figure S1:** The emission spectrum of the LED source used in the work. The emission peak width at half-maximum (FWHM) is around 20 nm

## SEM Analysis

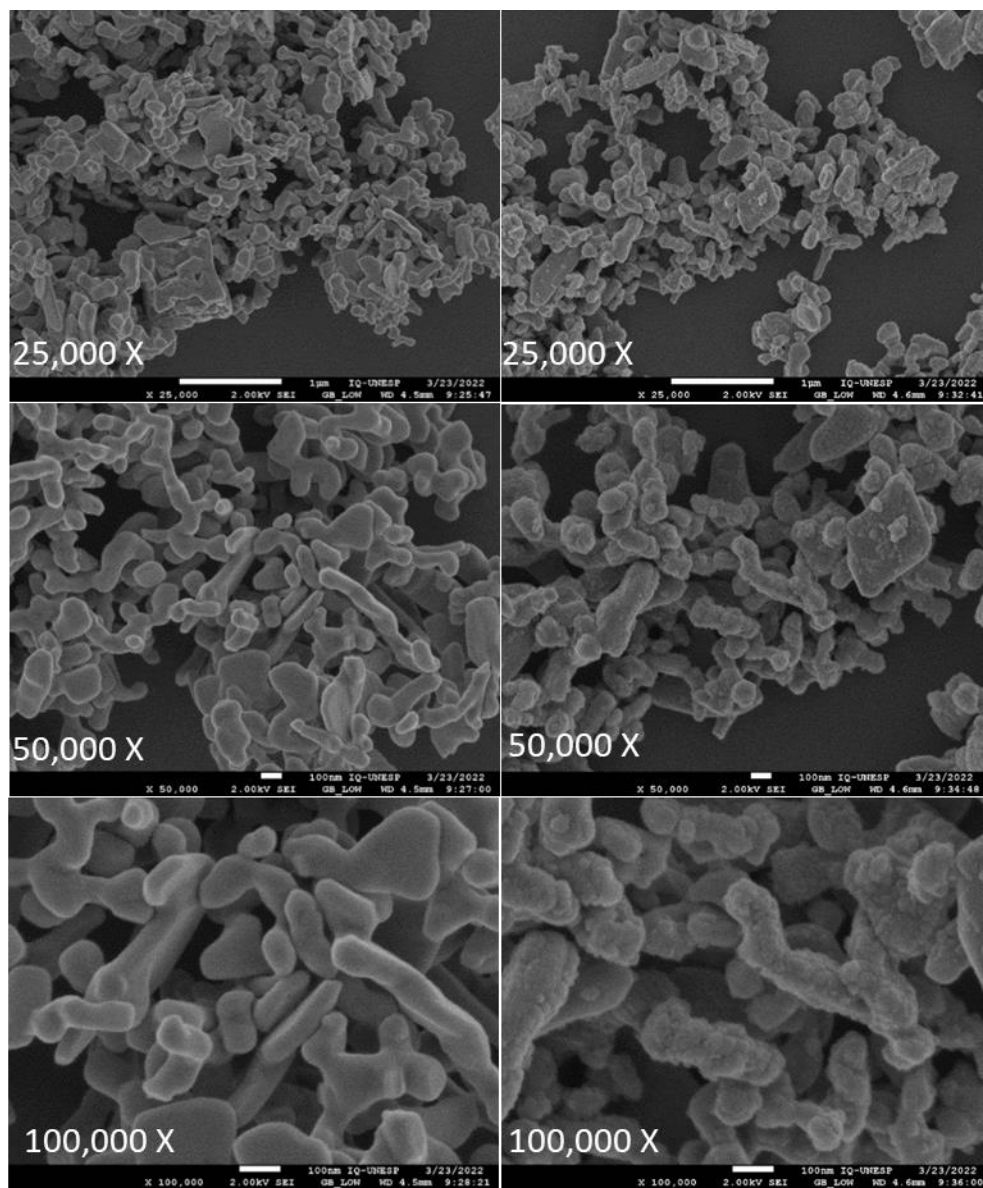

**Figure S2.** SEM images of Pure BV (left Column) and BV-PB3 (right Column) at three different magnifications of 25,000, 50,000, and 100,000.

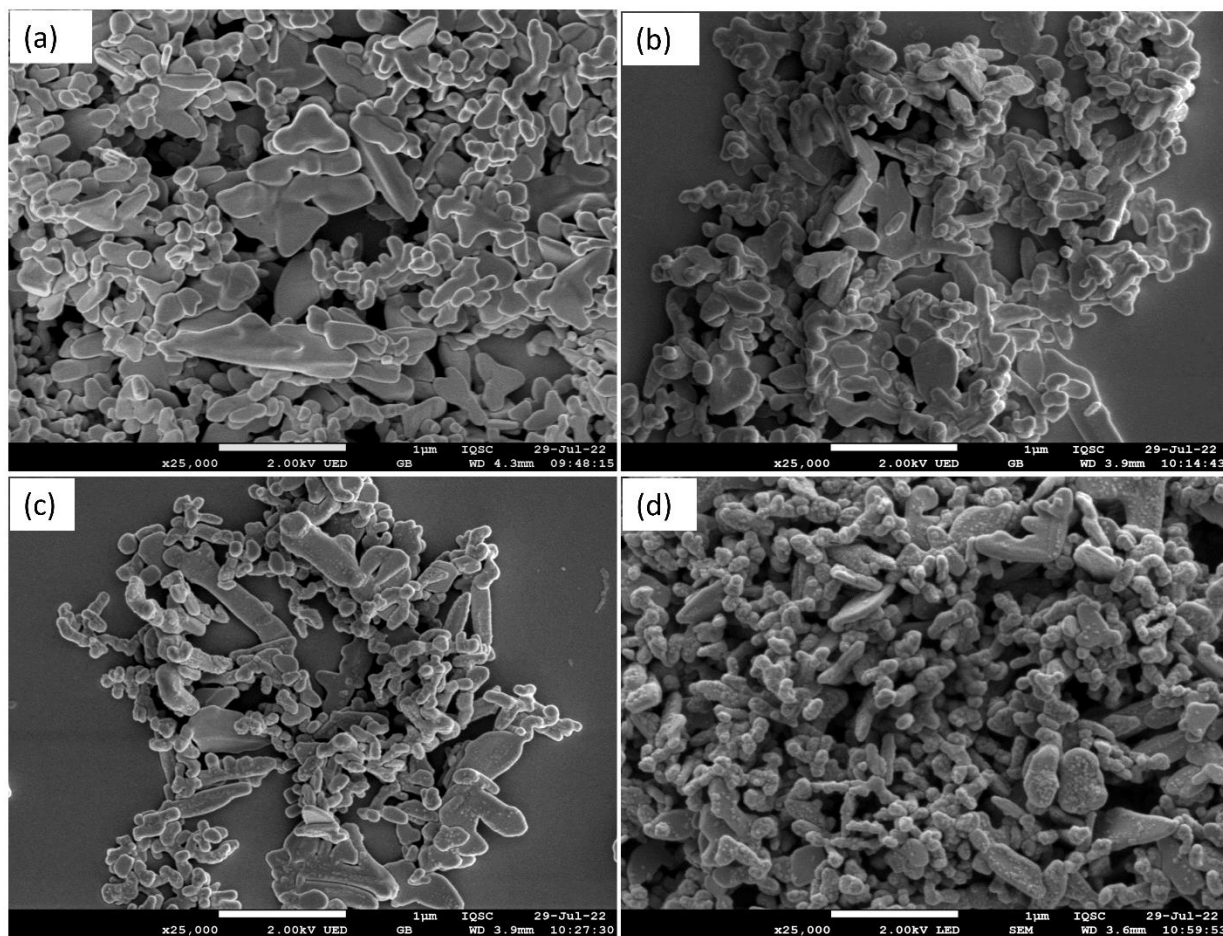

**Figure S3:** FEG-SEM images of BV (a), BV-PB1(b), BV-PB2 (c), and BV-PB4 (d) samples at the same magnification (25,000) showing a gradual change in morphology of the samples as a function of increasing PB loading.

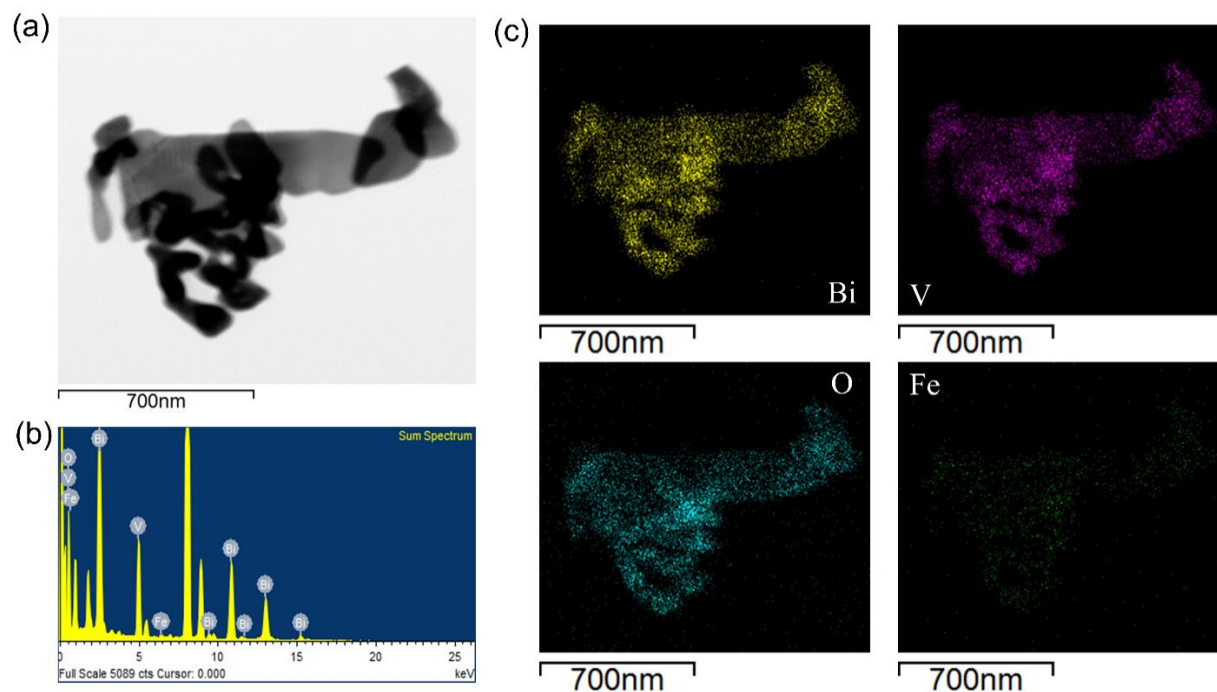

**Figure S4:** TEM image (a), EDX spectrum (b), and elemental mapping (c) of BV-PB2 sample.

## XRD Analysis

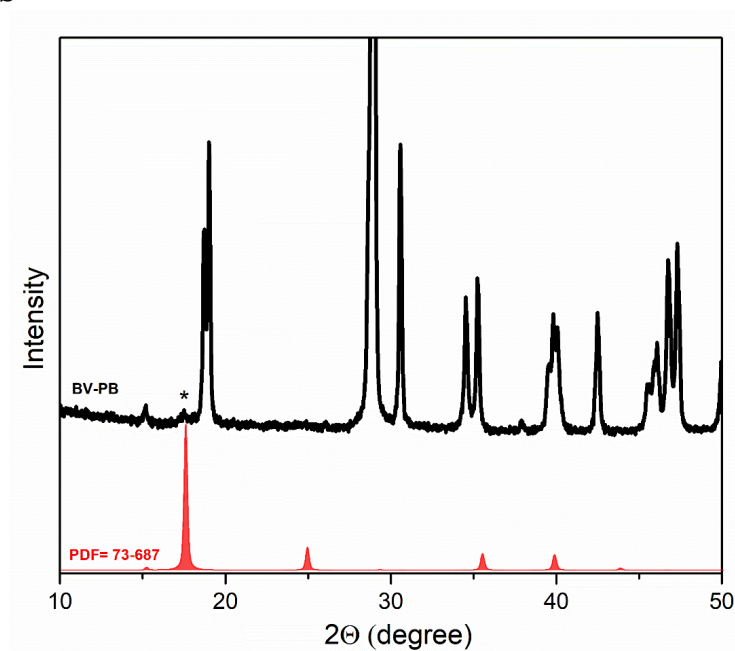

**Figure S5.** XRD pattern of Pure BV-BP (top) as compared to the standard diffraction pattern of PB (bottom) (PDF 73-687). The small diffraction features around  $2\theta$  value of  $17.5^\circ$  (indicated by \*) corresponds to the most intense diffraction from the (200) planes of the cubic structure of PB (PDF no 73-687).

## FTIR Analysis

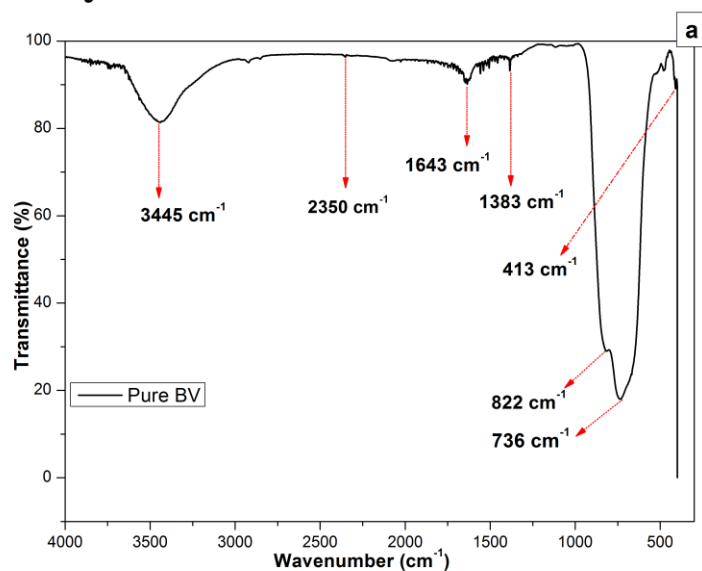

**Figure S6.** FTIR Spectrum of pure BV with the vibrational band positions marked.

## Photocatalytic tests

### *Photoreduction of MB*

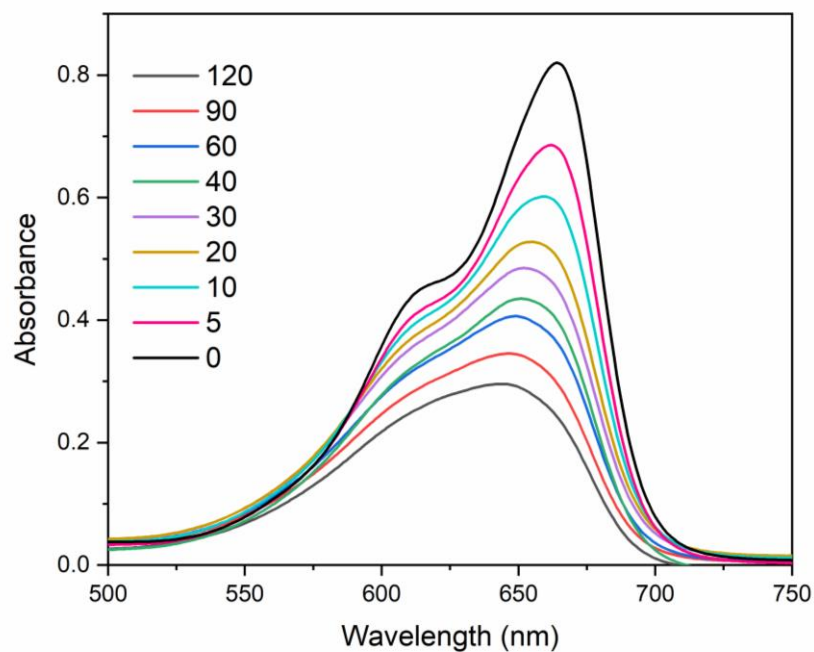

**Figure S7.** Electronic absorption spectra of MB dye as a function of LED illumination time (min) in the presence of pristine BV.

## (Photoreduction of Cr(VI))

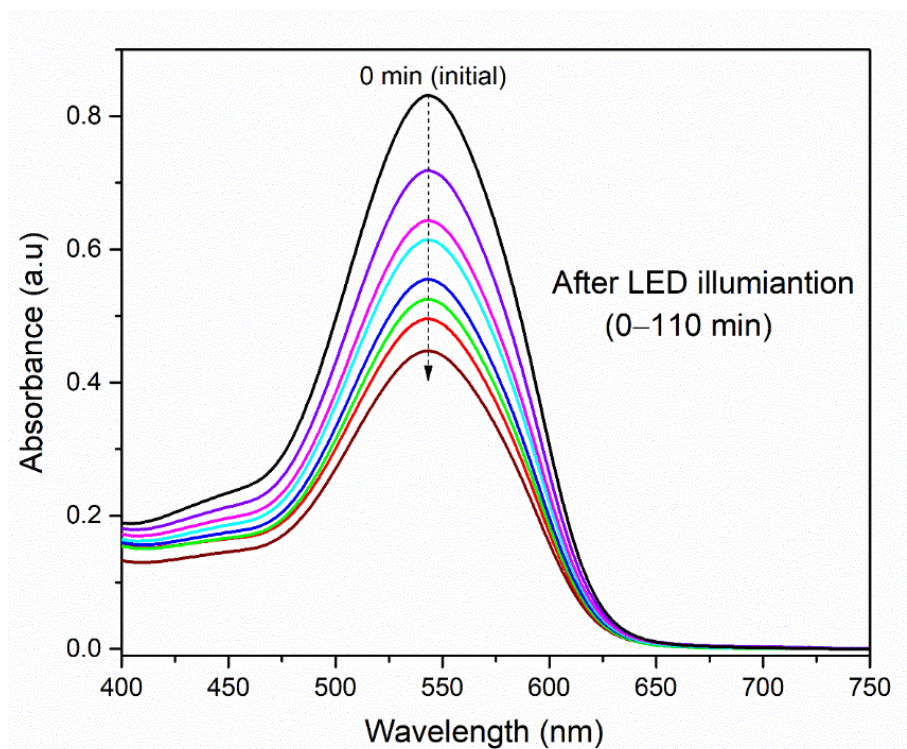

**Figure S8.** Absorption spectra of Cr(VI)-DPC complex before (0 min, black line) and after blue LEDs illumination (1–110 min, colored lines) showing the photoreduction of Cr(VI) to Cr(III) by the BV-PB3 sample.



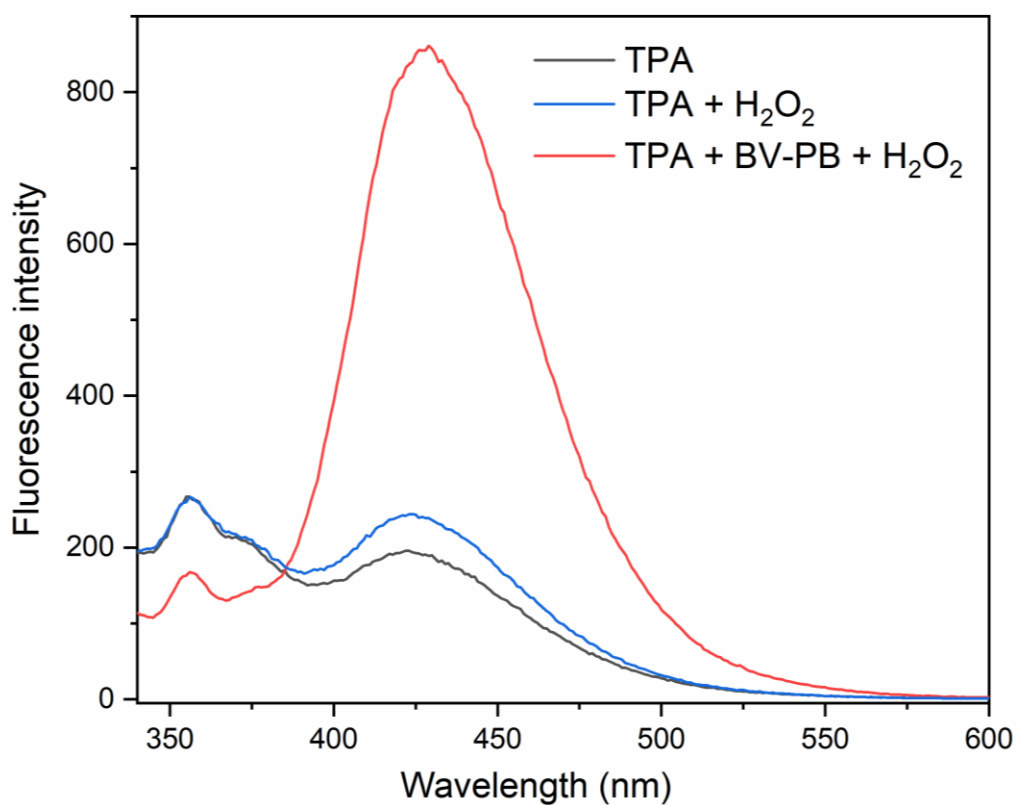

**Figure S9.** Fluorescence spectra of pure terephthalic acid, TPA, (black line), terephthalic acid in the presence of H<sub>2</sub>O<sub>2</sub> (blue line), and terephthalic acid in the presence of both BV-PB2 and H<sub>2</sub>O<sub>2</sub> after 5 min of LED illumination (red line).
